# Supplementary material for: Consistent static and small-signal physics-based modeling of dye-sensitized solar cells under different illumination conditions
Source: Royal Society of Chemistry journal article supplement (doi:10.1039/c3cp43802c), 2013-01-01
Supplement: c3cp43802c.pdf [file c3cp43802c.pdf]

Supplementary material

Extraction of the exponent ( $\beta$ ) of the nonlinear recombination term from EIS data.

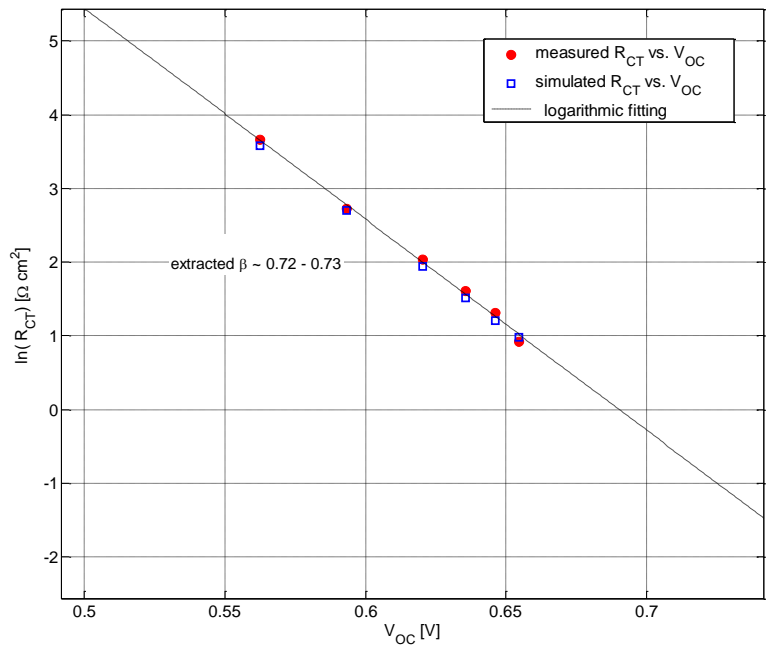

**Figure S1** Comparison between recombination resistance  $R_{CT}$  as extracted, through equivalent circuit fitting, from EIS measurements and EIS simulated data. The slope provides an estimation of the exponent ( $\beta$ ) of the nonlinear recombination term in close agreement with the value estimated from the analysis of the discrepancy between IPCE and I-V as outlined in the paper.
